# Supplementary figures and images for: Flame doping of indium ions into TiO2 nanorod arrays for enhanced photochemical water oxidation
Source: Royal Society of Chemistry journal article supplement (doi:10.1039/d3dt02120c), 2023-01-01

(a)

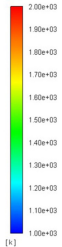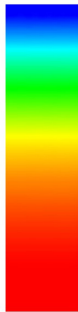

(b)

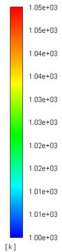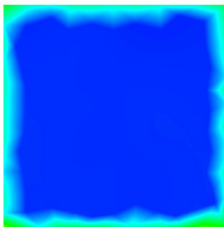

(c)

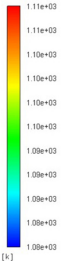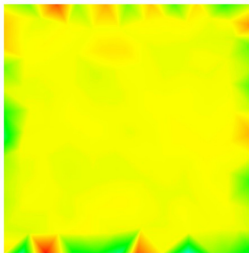

Supplement: d3dt02120c1.pdf [file d3dt02120c1.pdf]

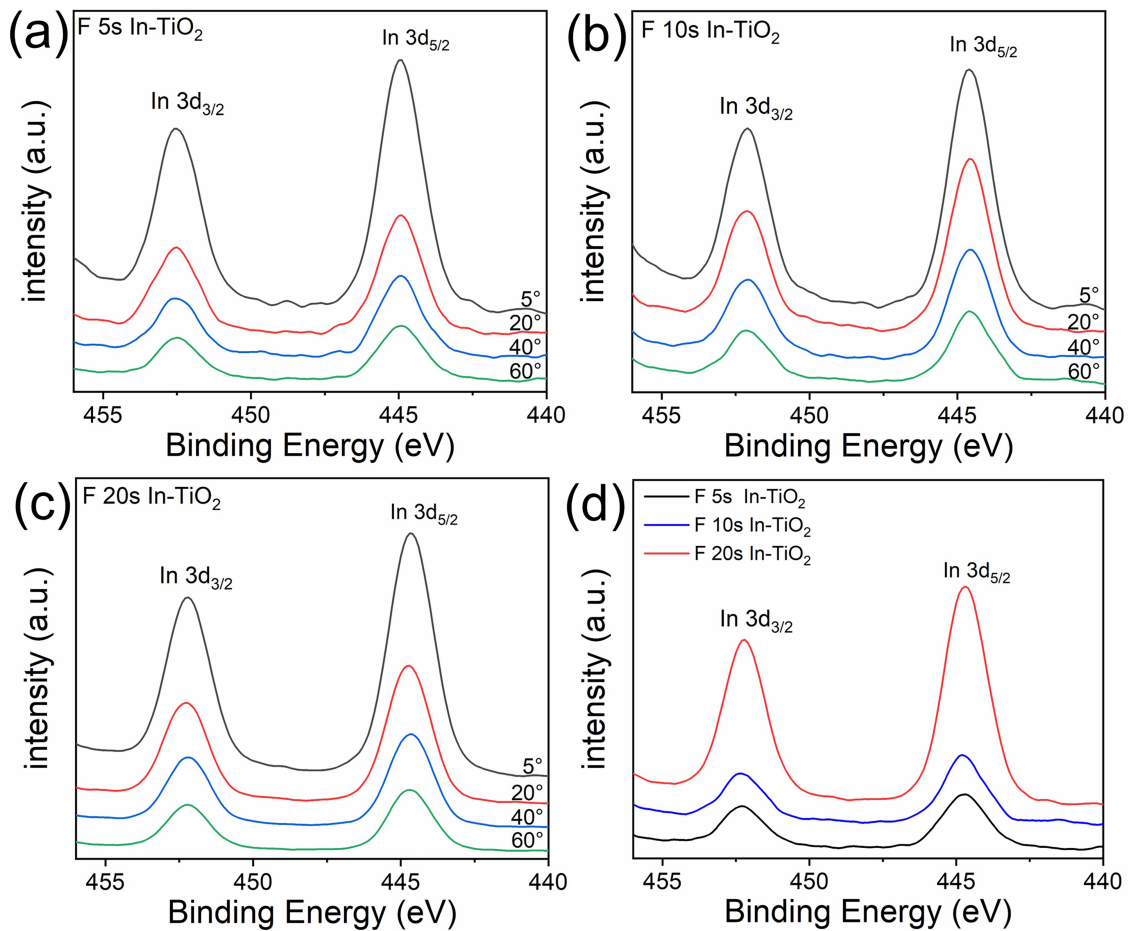

Supplement: d3dt02120c2.pdf [file d3dt02120c2.pdf]

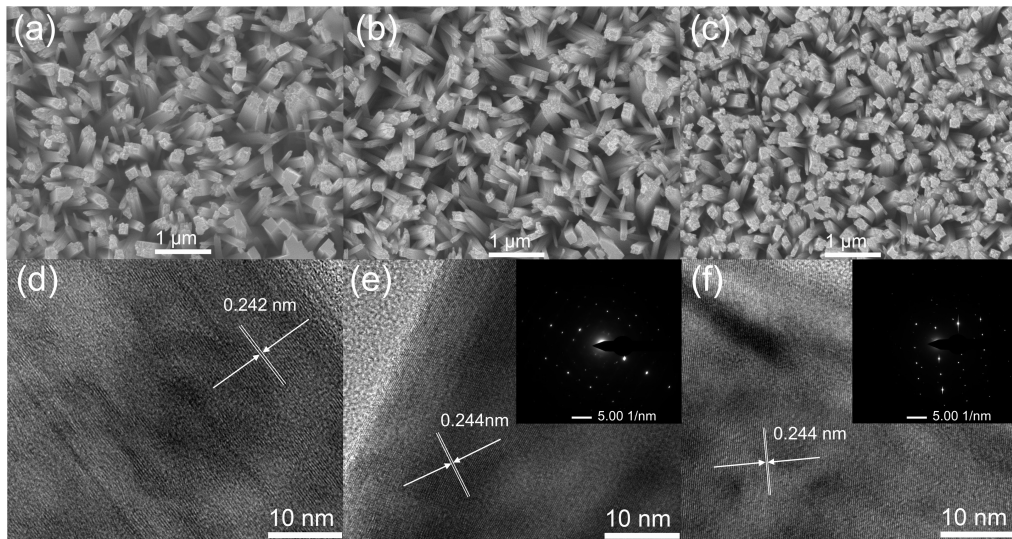

Supplement: d3dt02120c3.pdf [file d3dt02120c3.pdf]

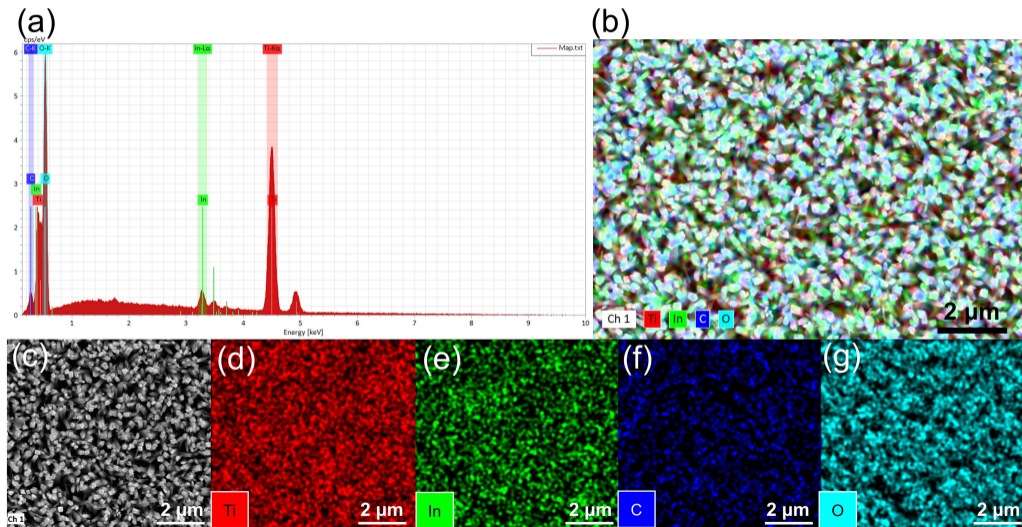

Supplement: d3dt02120c4.pdf [file d3dt02120c4.pdf]

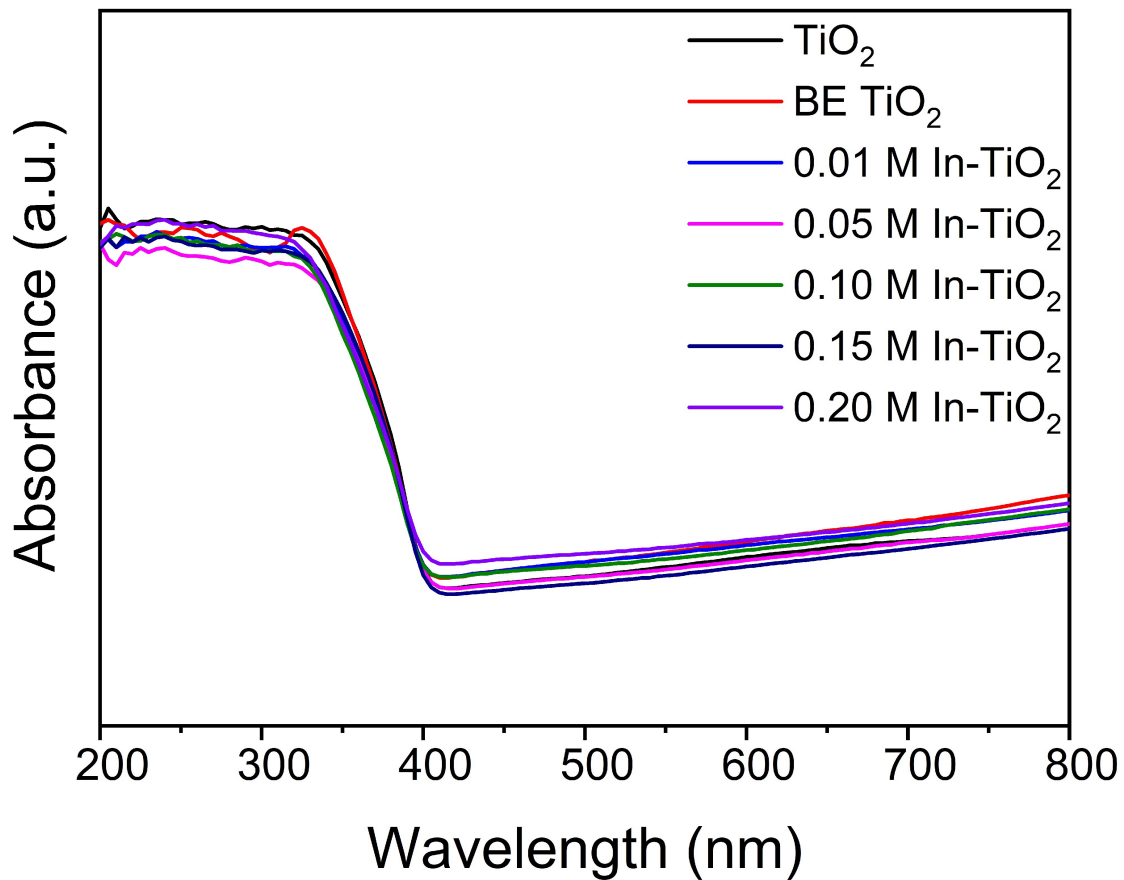

Supplement: d3dt02120c5.pdf [file d3dt02120c5.pdf]

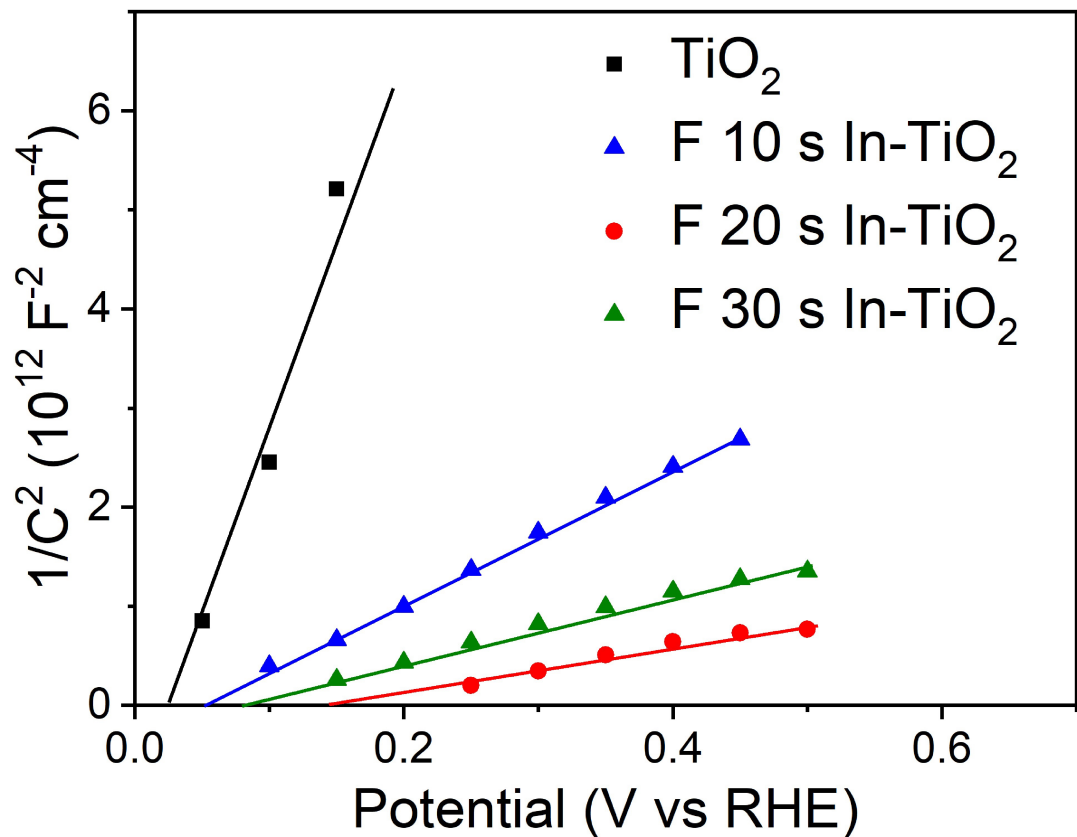

Supplement: d3dt02120c6.pdf [file d3dt02120c6.pdf]
